# Supplementary material for: Lifetime depression and age-related changes in body composition, cardiovascular function, grip strength and lung function: sex-specific analyses in the UK Biobank
Source: publisher site journal article supplement (doi:10.18632/aging.203275), 2021-07-07
Supplement: Supplementary file [file aging-v13i13-203275-supplementary-material-SD8.pdf]

## Supplementary Material 8. Sensitivity analyses.

### 8A. Case-control numbers.

Supplementary Table 4. Case-control numbers sensitivity analyses.

| Dataset              | Sex    | $\geq 2$ Depression measures |            | CIDI-SF lifetime depression (MHQ) |            |
|----------------------|--------|------------------------------|------------|-----------------------------------|------------|
|                      |        | Healthy control              | Depression | Healthy control                   | Depression |
| Main dataset         | Female | 123842                       | 23517      | 30113                             | 20482      |
|                      | Male   | 131212                       | 11785      | 32776                             | 9432       |
| Lung function        | Female | 43133                        | 8010       | 10750                             | 7162       |
|                      | Male   | 52359                        | 4617       | 13586                             | 3826       |
| Bone mineral density | Female | 85994                        | 12219      | 19420                             | 12907      |
|                      | Male   | 89790                        | 6075       | 21289                             | 6005       |
| Arterial stiffness   | Female | 38592                        | 11525      | 10818                             | 7688       |
|                      | Male   | 42889                        | 5899       | 11805                             | 3528       |

Note: CIDI-SF, Composite International Diagnostic Interview Short Form; MHQ, mental health questionnaire.

## 8B. Case control differences.

**Supplementary Table 5. Differences in physiological measures between individuals with lifetime depression and healthy controls.**

| Variable                    | ≥ 2 depression measures |        |                           |                        |        | CIDI-SF lifetime depression (MHQ) |                           |                        |        |        |
|-----------------------------|-------------------------|--------|---------------------------|------------------------|--------|-----------------------------------|---------------------------|------------------------|--------|--------|
|                             | SMD                     | 95% CI | <i>p</i> <sub>Bonf.</sub> | <i>p</i> <sub>BH</sub> | SMD    | 95% CI                            | <i>p</i> <sub>Bonf.</sub> | <i>p</i> <sub>BH</sub> |        |        |
| <b>Female</b>               |                         |        |                           |                        |        |                                   |                           |                        |        |        |
| Hand-grip strength          | -0.067                  | -0.081 | -0.053                    | <0.001                 | <0.001 | -0.042                            | -0.060                    | -0.025                 | <0.001 | <0.001 |
| Systolic blood pressure     | -0.192                  | -0.206 | -0.178                    | <0.001                 | <0.001 | -0.162                            | -0.180                    | -0.145                 | <0.001 | <0.001 |
| Diastolic blood pressure    | -0.047                  | -0.061 | -0.033                    | <0.001                 | <0.001 | -0.005                            | -0.023                    | 0.013                  | >0.999 | 0.600  |
| Pulse rate                  | 0.028                   | 0.014  | 0.042                     | 0.002                  | <0.001 | 0.052                             | 0.034                     | 0.070                  | <0.001 | <0.001 |
| Body mass index             | 0.190                   | 0.176  | 0.204                     | <0.001                 | <0.001 | 0.230                             | 0.212                     | 0.248                  | <0.001 | <0.001 |
| Body fat percentage         | 0.165                   | 0.151  | 0.179                     | <0.001                 | <0.001 | 0.193                             | 0.175                     | 0.210                  | <0.001 | <0.001 |
| Fat mass                    | 0.211                   | 0.197  | 0.225                     | <0.001                 | <0.001 | 0.227                             | 0.209                     | 0.245                  | <0.001 | <0.001 |
| Fat-free mass               | 0.181                   | 0.167  | 0.195                     | <0.001                 | <0.001 | 0.166                             | 0.148                     | 0.184                  | <0.001 | <0.001 |
| Waist-hip ratio             | 0.115                   | 0.101  | 0.129                     | <0.001                 | <0.001 | 0.122                             | 0.104                     | 0.139                  | <0.001 | <0.001 |
| Peak expiratory flow        | 0.120                   | 0.096  | 0.144                     | <0.001                 | <0.001 | 0.073                             | 0.043                     | 0.103                  | <0.001 | <0.001 |
| Forced expiratory volume 1s | 0.110                   | 0.086  | 0.134                     | <0.001                 | <0.001 | 0.067                             | 0.037                     | 0.097                  | <0.001 | <0.001 |
| Forced vital capacity       | 0.102                   | 0.078  | 0.126                     | <0.001                 | <0.001 | 0.049                             | 0.019                     | 0.079                  | 0.021  | 0.002  |
| FEV <sub>1</sub> / FVC      | 0.043                   | 0.019  | 0.067                     | 0.006                  | <0.001 | 0.051                             | 0.021                     | 0.081                  | 0.011  | 0.001  |
| Heel bone mineral density   | 0.024                   | 0.005  | 0.043                     | 0.177                  | 0.013  | 0.028                             | 0.005                     | 0.050                  | 0.227  | 0.017  |
| Arterial stiffness          | 0.007                   | -0.014 | 0.028                     | >0.999                 | 0.448  | 0.016                             | -0.013                    | 0.045                  | >0.999 | 0.301  |
| <b>Male</b>                 |                         |        |                           |                        |        |                                   |                           |                        |        |        |
| Hand-grip strength          | -0.116                  | -0.135 | -0.097                    | <0.001                 | <0.001 | -0.002                            | -0.025                    | 0.020                  | >0.999 | 0.900  |
| Systolic blood pressure     | -0.159                  | -0.178 | -0.140                    | <0.001                 | <0.001 | -0.143                            | -0.166                    | -0.120                 | <0.001 | <0.001 |
| Diastolic blood pressure    | -0.044                  | -0.063 | -0.025                    | <0.001                 | <0.001 | -0.002                            | -0.025                    | 0.021                  | >0.999 | 0.900  |
| Pulse rate                  | 0.109                   | 0.090  | 0.128                     | <0.001                 | <0.001 | 0.088                             | 0.066                     | 0.111                  | <0.001 | <0.001 |
| Body mass index             | 0.140                   | 0.121  | 0.158                     | <0.001                 | <0.001 | 0.192                             | 0.169                     | 0.215                  | <0.001 | <0.001 |
| Body fat percentage         | 0.134                   | 0.115  | 0.153                     | <0.001                 | <0.001 | 0.142                             | 0.119                     | 0.165                  | <0.001 | <0.001 |
| Fat mass                    | 0.165                   | 0.146  | 0.184                     | <0.001                 | <0.001 | 0.183                             | 0.160                     | 0.206                  | <0.001 | <0.001 |
| Fat-free mass               | 0.097                   | 0.078  | 0.116                     | <0.001                 | <0.001 | 0.137                             | 0.114                     | 0.160                  | <0.001 | <0.001 |
| Waist-hip ratio             | 0.167                   | 0.148  | 0.185                     | <0.001                 | <0.001 | 0.167                             | 0.144                     | 0.190                  | <0.001 | <0.001 |
| Peak expiratory flow        | 0.005                   | -0.025 | 0.035                     | >0.999                 | 0.793  | 0.019                             | -0.017                    | 0.055                  | >0.999 | 0.413  |
| Forced expiratory volume 1s | 0.003                   | -0.027 | 0.033                     | >0.999                 | 0.837  | 0.045                             | 0.009                     | 0.081                  | 0.224  | 0.022  |
| Forced vital capacity       | 0.011                   | -0.019 | 0.041                     | >0.999                 | 0.564  | 0.046                             | 0.011                     | 0.082                  | 0.190  | 0.021  |
| FEV <sub>1</sub> / FVC      | -0.013                  | -0.043 | 0.017                     | >0.999                 | 0.517  | 0.006                             | -0.030                    | 0.042                  | >0.999 | 0.900  |
| Heel bone mineral density   | -0.101                  | -0.127 | -0.075                    | <0.001                 | <0.001 | -0.074                            | -0.102                    | -0.045                 | <0.001 | <0.001 |
| Arterial stiffness          | 0.020                   | -0.007 | 0.047                     | >0.999                 | 0.092  | 0.001                             | -0.037                    | 0.038                  | >0.999 | 0.974  |

Note: SMD, standardised mean difference; CI, confidence interval; Bonf, Bonferroni; BH, Benjamini and Hochberg; FEV<sub>1</sub>, forced expiratory volume in one second; FVC, forced vital capacity; CIDI-SF, Composite International Diagnostic Interview Short Form; MHQ, mental health questionnaire. *P*-values for Welch's *t*-test.

## 8C. Age-related changes in females.

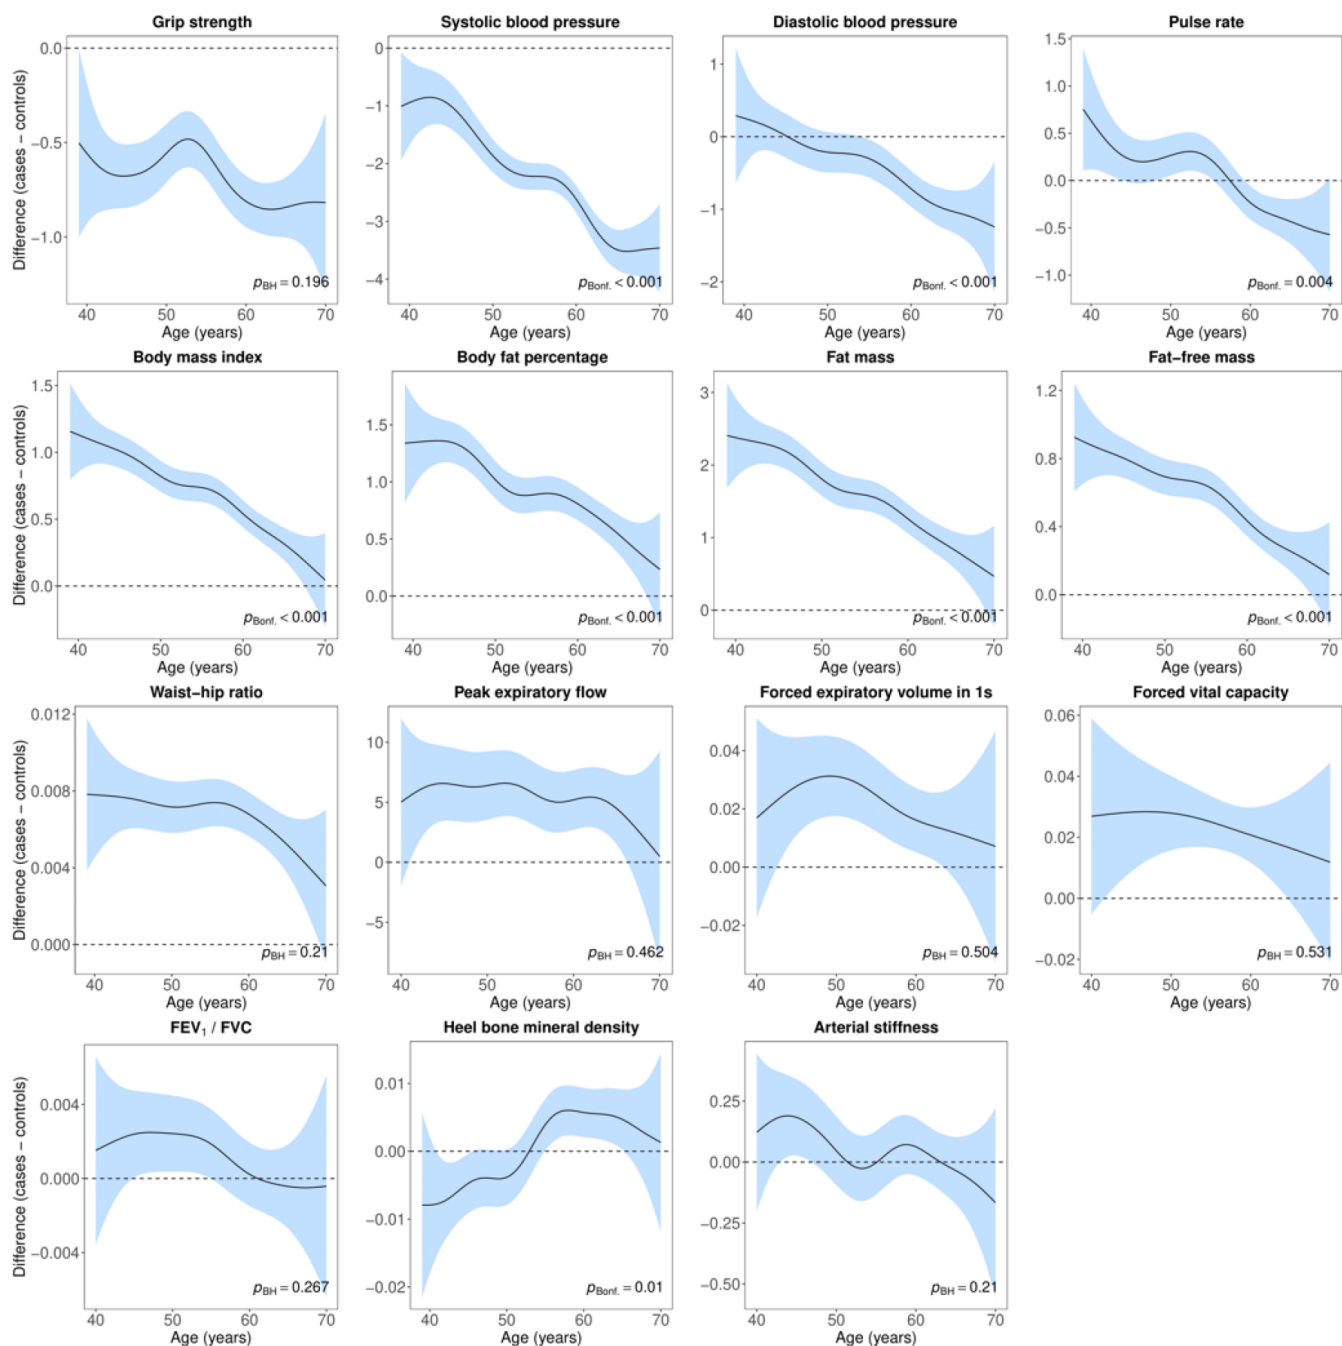

**Supplementary Figure 6. Difference smooths comparing age-related changes in physiological measures of females with lifetime depression ( $\geq 2$  depression measures) to healthy controls.** Models were adjusted for ethnicity (except lung function), gross annual household income, physical activity, smoking status, alcohol intake frequency, sleep duration and, for cardiovascular measures, current use of antihypertensive medications. The shaded areas correspond to approximate 95% confidence intervals ( $\pm 2 \times$  standard error). Negative values on the y-axes correspond to lower values in females with lifetime depression compared to healthy controls. The horizontal lines represent no difference between female cases and controls.  $FEV_1$ , forced expiratory volume in one second; FVC, forced vital capacity; Bonf, Bonferroni; BH, Benjamini and Hochberg.

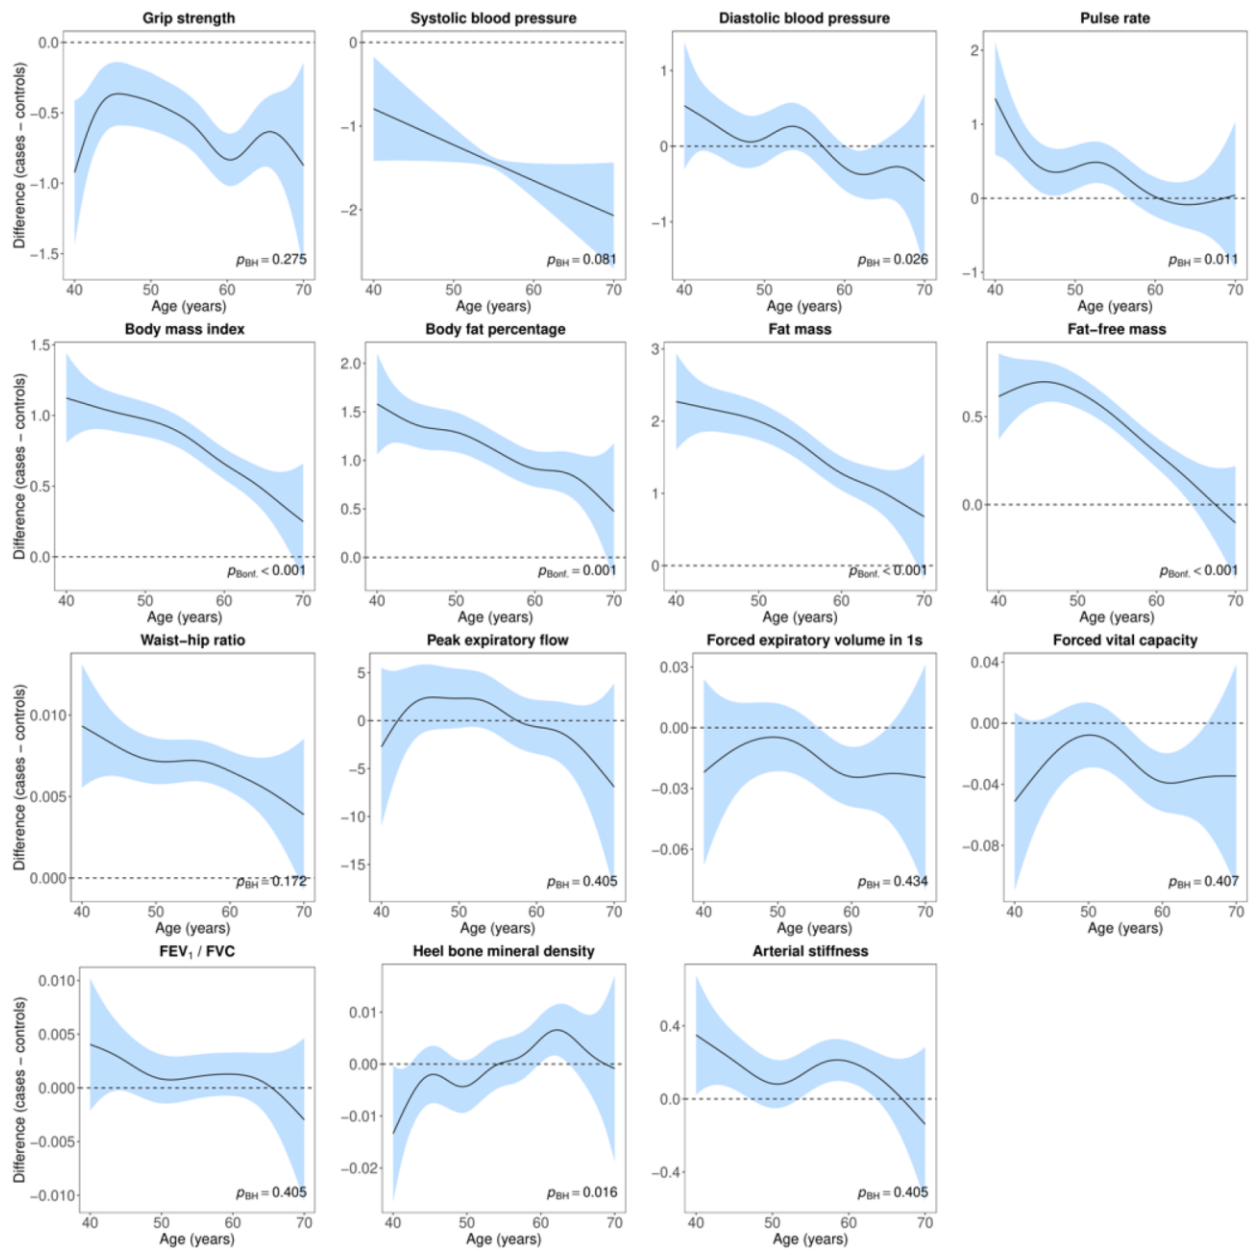

**Supplementary Figure 7. Difference smooths comparing age-related changes in physiological measures of females with lifetime depression (CIDI-SF) to healthy controls.** Models were adjusted for ethnicity (except lung function), gross annual household income, physical activity, smoking status, alcohol intake frequency, sleep duration and, for cardiovascular measures, current use of antihypertensive medications. The shaded areas correspond to approximate 95% confidence intervals ( $\pm 2 \times$  standard error). Negative values on the y-axes correspond to lower values in females with lifetime depression compared to healthy controls. The horizontal lines represent no difference between female cases and controls. CIDI-SF, Composite International Diagnostic Interview Short Form; FEV<sub>1</sub>, forced expiratory volume in one second; FVC, forced vital capacity; Bonf, Bonferroni; BH, Benjamini and Hochberg.

## 8D. Age-related changes in males.

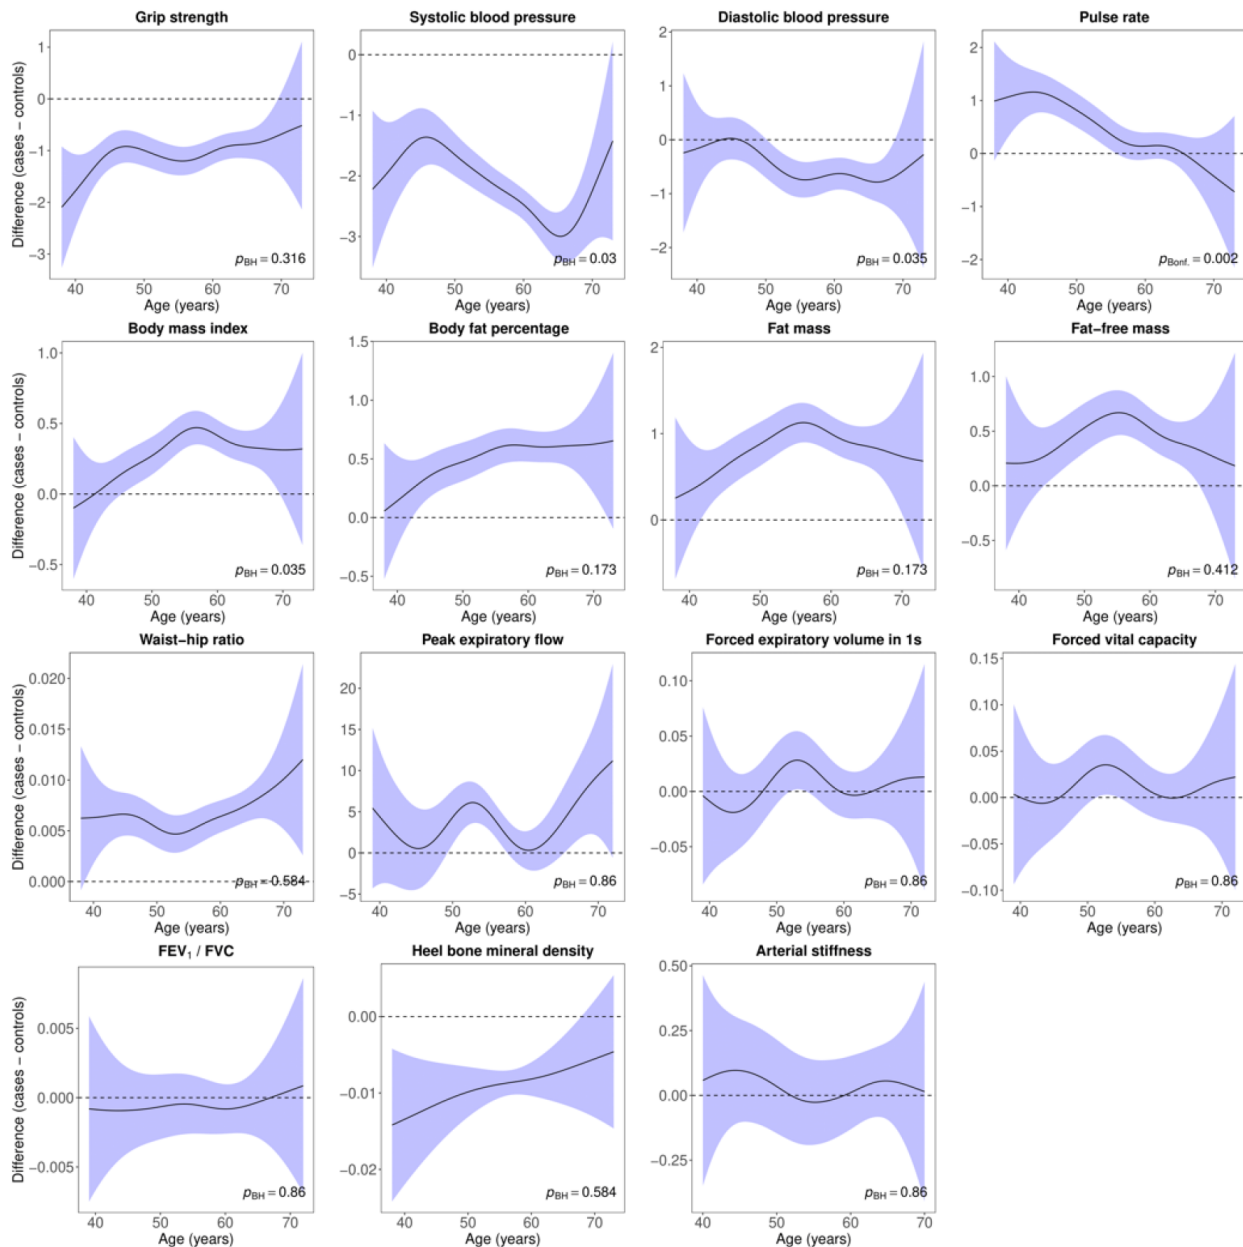

**Supplementary Figure 8. Difference smooths comparing age-related changes in physiological measures of males with lifetime depression ( $\geq 2$  depression measures) to healthy controls.** Models were adjusted for ethnicity (except lung function), gross annual household income, physical activity, smoking status, alcohol intake frequency, sleep duration and, for cardiovascular measures, current use of antihypertensive medications. The shaded areas correspond to approximate 95% confidence intervals ( $\pm 2 \times$  standard error). Negative values on the y-axes correspond to lower values in males with lifetime depression compared to healthy controls. The horizontal lines represent no difference between male cases and controls. FEV<sub>1</sub>, forced expiratory volume in one second; FVC, forced vital capacity; Bonf, Bonferroni; BH, Benjamini and Hochberg.

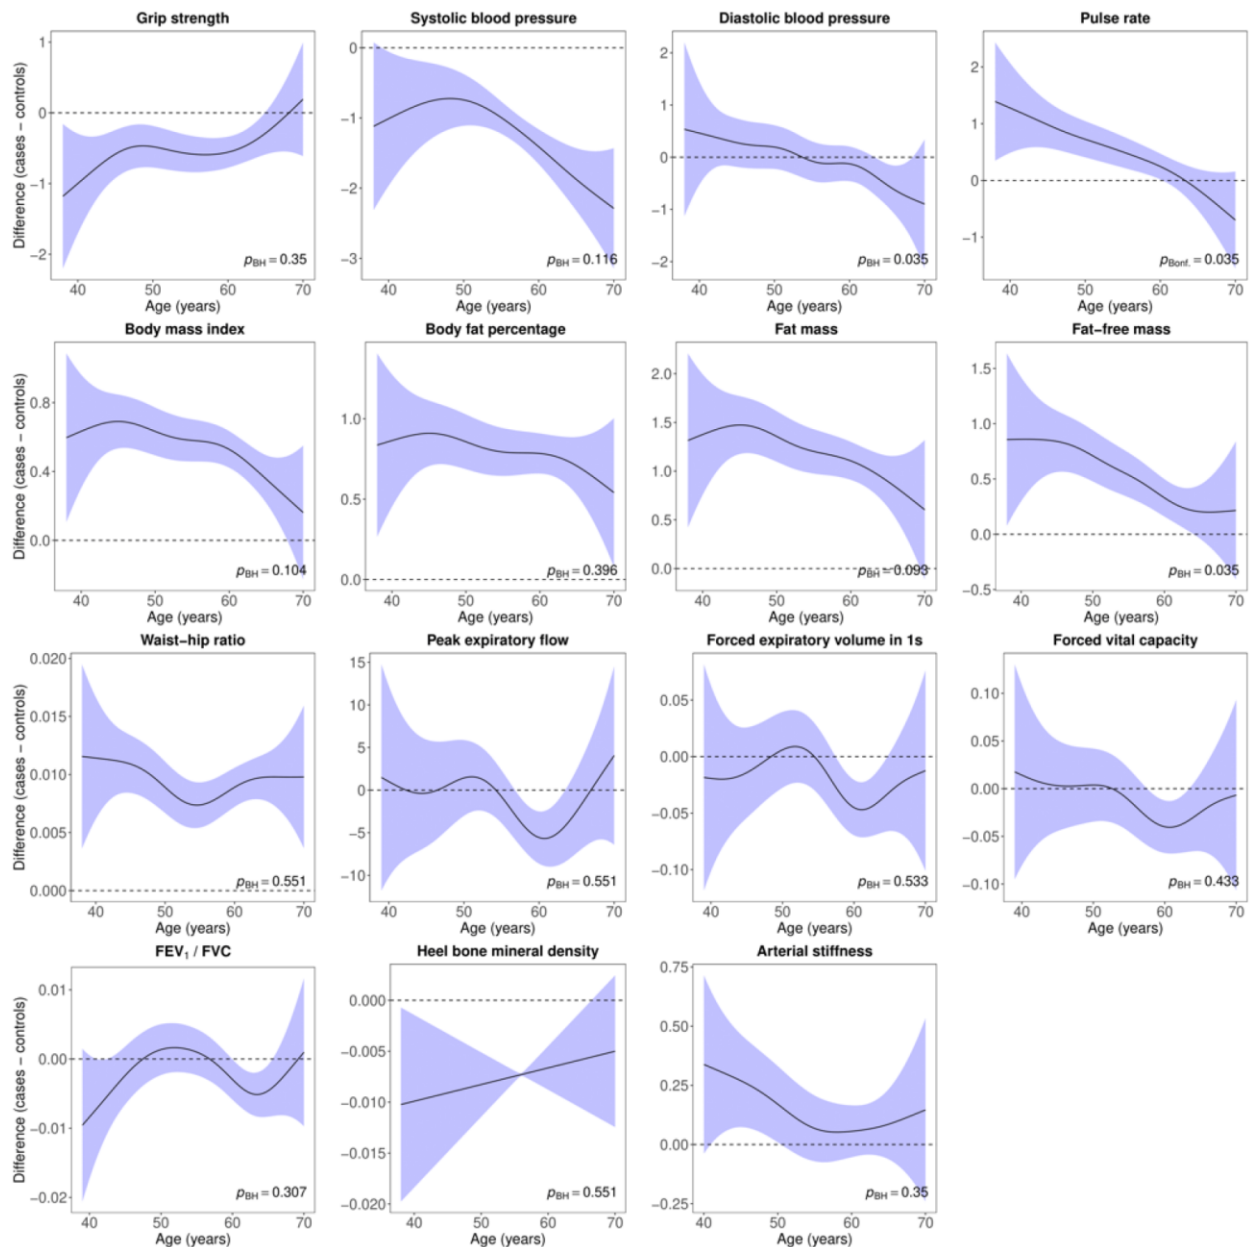

**Supplementary Figure 9. Difference smooths comparing age-related changes in physiological measures of males with lifetime depression (CIDI-SF) to healthy controls.** Models were adjusted for ethnicity (except lung function), gross annual household income, physical activity, smoking status, alcohol intake frequency, sleep duration and, for cardiovascular measures, current use of antihypertensive medications. The shaded areas correspond to approximate 95% confidence intervals ( $\pm 2 \times$  standard error). Negative values on the y-axes correspond to lower values in males with lifetime depression compared to healthy controls. The horizontal lines represent no difference between male cases and controls. CIDI-SF, Composite International Diagnostic Interview Short Form; FEV<sub>1</sub>, forced expiratory volume in one second; FVC, forced vital capacity; Bonf., Bonferroni; BH, Benjamini and Hochberg.
